# Supplementary material
Source: Springer Nature journal article supplement (https://www.springermedizin.de/resource/supplementary/12894_2002_17_MOESM4_ESM.pdf/9513714)
Supplement: MOESM4 [file 9513714]

**Additional file 4: Baseline characteristics of men in the included studies**

| Author                  | Finasteride Daily dose (mg)       | Control                            | Duration  | Baseline entry criteria                                                                                                                                                                         | Patients                                                                                                                                                                                                                             | Score used                    | Symptom score                                                                                                                                                                             | Qmax (mL/s)                                         | Mean flow rate (mL/s)                 | Prostate volume (cm <sup>3</sup> )                 | Residual urine (ml)                    | Total voided volume (ml)                   | PSA (ng/ml)                                           | DHT                                    | Bother                                                          | Sexual function score (0-20)         |
|-------------------------|-----------------------------------|------------------------------------|-----------|-------------------------------------------------------------------------------------------------------------------------------------------------------------------------------------------------|--------------------------------------------------------------------------------------------------------------------------------------------------------------------------------------------------------------------------------------|-------------------------------|-------------------------------------------------------------------------------------------------------------------------------------------------------------------------------------------|-----------------------------------------------------|---------------------------------------|----------------------------------------------------|----------------------------------------|--------------------------------------------|-------------------------------------------------------|----------------------------------------|-----------------------------------------------------------------|--------------------------------------|
| Abrams et al, 1999      | 5 mg (n=81)<br>At 9 & 12 mth n=69 | Placebo (n=40)<br>At 9 mth n=37    | 12 months | Enlarged prostate by DRE<br>Lower urinary tract symptoms<br>Objective evidence of outlet obstruction (pressure flow)<br>Mean symptom score shows moderate / severe at baseline<br>PSA ≤10 ng/ml | Mean age: 67 years                                                                                                                                                                                                                   | AUA                           | Fin: 19.4 ± 6.3<br>Placebo: 17.4 ± 6.8<br><br>% obstructed:<br>Fin: 76%<br>Placebo: 82.5%                                                                                                 | Fin: 7.6 ± 2.4<br>Placebo: 7.1 ± 2.0                | Fin: 10.0 ± 4.2<br>Placebo: 9.1 ± 3.7 | Fin: 45.1<br>Placebo: 44.8;                        |                                        |                                            | <10 ng/ml                                             |                                        |                                                                 |                                      |
| Andersen et al, 1995    | 5 mg (n=353)<br>Completed (287)   | Placebo (n=354)<br>Completed (290) | 24 months | Moderate Enlarged prostate by DRE<br>Age ≤80<br>Max urinary flow rate ≥5 & ≤15 cc/s at screening.                                                                                               | 707 patients enrolled<br>Mean age 65.5 yrs (range 46-80)                                                                                                                                                                             | Boyarsky (modified Bolognese) | Fin: 13.4<br>Placebo: 13.1<br><br>Obstructive score:<br>Fin: 8.8<br>Placebo: 8.6                                                                                                          | Fin: 10.2<br>Placebo: 10.5                          | Fin: 5.2<br>Placebo: 5.5              | Prostate volume:<br>Fin: 40.6<br>Placebo: 41.7     | Post-void residual volume <150 cc      |                                            | <10 ng/ml                                             |                                        |                                                                 |                                      |
| Beisland HO et al, 1992 | 5 mg (n=94)                       | Placebo (n=88)                     | 6 months  | Enlarged prostate (palpation)<br>Symptoms of urinary obstruction<br>Max urinary flow <15 mL/s                                                                                                   | Number patients enrolled: 182<br>Number patients completed: 168<br><br>45% of patients in each group had mild symptoms.<br><br>Mean age 67 years (range 46-80)                                                                       | Boyarsky (modified)           | Fin: 8.8 ± 6.1<br>Placebo: 7.8 ± 4.9<br><br>Obstructive symptom score:<br>Fin: 2.2 ± 4.0;<br>Placebo: 1.1 ± 3.3<br><br>Troublesome symptom score:<br>Fin: 7.1 ± 3.7<br>Placebo: 6.8 ± 3.9 | Fin: 8.0 ± 3.0;<br>Placebo: 7.6 ± 3.1               |                                       | Median<br>Fin: 44.2 ± 22.4<br>Placebo: 43.8 ± 24.1 |                                        |                                            |                                                       | Fin: 74.6 ng/dl<br>Placebo: 65.2 ng/dl |                                                                 |                                      |
| Byrnes et al, 1995      | 5 mg (n=1821)                     | Placebo (n=596)                    | 12 months | Clinical diagnosis of BPH with prostate enlargement on DRE<br><br>Moderate / severe (1.9% pts had mild symptoms with finasteride & 2.2% with placebo)                                           | 2917 patients enrolled.<br>Efficacy population: 2342<br>Safety population: 2417<br><br>Aged ≥45 years<br><br>Mainly Caucasian                                                                                                        | AUA                           | Baseline not provided                                                                                                                                                                     |                                                     |                                       |                                                    |                                        |                                            | <10 ng/ml                                             | Fin: 48.2ng/dl<br>Placebo: 46.6 ng/dl  | BPH Impact index (BI): max score 13<br>Fin: 5.1<br>Placebo: 5.0 |                                      |
| Carraro et al, 1996     | 5 mg (n=545)                      | Permixon (serenoa repens) (n=553)  | 26 weeks  | AUA ≥6,<br>Max urinary flow 4-15 mL/s<br>Clinical BPH by DRE (prostate >25 ml)<br>PSA <10 ng/ml                                                                                                 | 1098 randomised<br><br>Completed trial: 951 (Fin 484, permixon 467)<br><br>Mean age 64 years (range 49-88)<br><br>Mean body mass index: 26 (range 17-38)<br><br>Quality of life score (0-6):<br>Fin: 3.6 ± 1.3<br>Placebo: 3.7 ± 1.2 | AUA (0-35)                    | Fin: 15.7 ± 5.7; 2;<br>26 wks -6.2<br>Permixon: 15.7 ± 5.8                                                                                                                                | Fin: 10.8 ± 2.8<br>Permixon:<br>Baseline 10.6 ± 2.8 | Fin: 5.4 ± 2.1<br>Placebo: 5.5 ± 2.3  | Fin: 44.0 ± 20.6<br>Permixon: 43.0 ± 19.6          | Fin: 52 ± 44 ml<br>Placebo: 52 ± 44 ml | Fin: 247 ± 111 ml<br>Placebo: 241 ± 104 ml | PSA <10 ng/ml<br>Fin: 3.3 ± 3.4<br>Placebo: 3.2 ± 3.3 |                                        |                                                                 | Fin: 8.4 ± 5.5<br>Placebo: 8.5 ± 5.5 |

| Author                        | Finasteride Daily dose (mg)  | Control                           | Duration  | Baseline entry criteria                                                                                                                                              | Patients                                                                                                                                                                                                                | Score used                | Symptom score                                                                                         | Qmax (mL/s)                                                                    | Mean flow rate (mL/s)                            | Prostate volume (cm <sup>3</sup> )                                                 | Residual urine (ml)                                                    | Total voided volume (ml)                                                     | PSA (ng/ml)                                                                  | DHT                                                                                                        | Bother | Sexual function score (0-20) |  |
|-------------------------------|------------------------------|-----------------------------------|-----------|----------------------------------------------------------------------------------------------------------------------------------------------------------------------|-------------------------------------------------------------------------------------------------------------------------------------------------------------------------------------------------------------------------|---------------------------|-------------------------------------------------------------------------------------------------------|--------------------------------------------------------------------------------|--------------------------------------------------|------------------------------------------------------------------------------------|------------------------------------------------------------------------|------------------------------------------------------------------------------|------------------------------------------------------------------------------|------------------------------------------------------------------------------------------------------------|--------|------------------------------|--|
| Debruyne et al, 1998          | 5 mg (n=344)                 | Alfuzosin 10 mg daily (n=358)     | 6 months  | AUA score $\geq 7$<br>Qmax between 5-15 mL/s                                                                                                                         | Randomised: 1051 patients. Completed study: 918                                                                                                                                                                         | AUA                       | Fin: 15.5 $\pm$ 5.2<br>Alf: 15.3 $\pm$ 5.5<br>Combination: 15.6 $\pm$ 5.7                             | Fin: 9.8 $\pm$ 2.6<br>Alf: 9.7 $\pm$ 2.8<br>Combination: 10.1 $\pm$ 3.5        |                                                  | Fin: 40.9 $\pm$ 23.5;<br>Alf: 41.4 $\pm$ 25.7<br>Combination: 41.1 $\pm$ 22.6      |                                                                        |                                                                              | <10 ng/ml                                                                    |                                                                                                            |        |                              |  |
| ALFIN study                   |                              | Combination (n=349)<br>No placebo |           | LUTS associated with BPH<br>No threshold for prostate volume<br>PSA <10 ng/ml                                                                                        | Aged 50-75 years<br>LUTS related to BPH. 46% aged over 65 years.<br><br>32% had concomitant treated hypertension.<br><br>9% mild, 78% moderate, 21% severe at baseline<br><br>Duration of symptoms: about 3.5 years     |                           |                                                                                                       |                                                                                |                                                  |                                                                                    |                                                                        |                                                                              |                                                                              |                                                                                                            |        |                              |  |
| Finasteride study group, 1993 | 1 mg (n=249)<br>5 mg (n=246) | Placebo (n=255)                   | 12 months | Symptoms or urinary obstruction<br>Voided vol $\geq 150$ ml only included in analysis<br>Max urinary flow rate <15 mL/s<br>Prostate volume $\geq 30$ cm <sup>3</sup> | Baseline total symptom score: 18 $\pm$ 6 (moderate)<br>Mean age: 66 yrs (range 46-83)<br>Mean prostate volume (cm <sup>3</sup> ):<br>Fin 1 mg: 47.5 $\pm$ 22.5<br>Fin 5 mg: 47.0 $\pm$ 20.8<br>Placebo: 46.3 $\pm$ 23.4 | Boyersky                  | Fin 1 mg: 18.7 $\pm$ 6.0<br>Fin 5 mg: 18.6 $\pm$ 6.0<br>Placebo: 18.2 $\pm$ 5.9                       | Fin 1 mg: 8.8 $\pm$ 3.7<br>Fin 5 mg: 9.2 $\pm$ 4.0<br>Placebo: 8.6 $\pm$ 3.4   |                                                  | Fin 1 mg: 47.5 $\pm$ 22.5<br>Fin 5 mg: 47.0 $\pm$ 20.8<br>Placebo: 46.3 $\pm$ 23.4 |                                                                        | Fin 1 mg: 5.5 $\pm$ 7.3<br>Fin 5 mg: 5.8 $\pm$ 6.7<br>Placebo: 5.7 $\pm$ 7.2 |                                                                              | Fin 1 mg: 478.7 $\pm$ 168.3 ng/dl<br>Fin 5 mg: 486.9 $\pm$ 190.2 ng/dl<br>Placebo: 475.4 $\pm$ 156.7 ng/dl |        |                              |  |
| International study           |                              |                                   |           |                                                                                                                                                                      |                                                                                                                                                                                                                         |                           | Obstructive score:<br>Fin 1 mg: 11.5 $\pm$ 3.8<br>Fin 5 mg: 11.2 $\pm$ 3.8<br>Placebo: 11.1 $\pm$ 3.7 |                                                                                |                                                  |                                                                                    |                                                                        |                                                                              |                                                                              |                                                                                                            |        |                              |  |
| Gormley et al, 1992           | 1 mg (n=298)<br>5 mg (n=297) | Placebo (n=300)                   | 12 months | Enlarged prostate on DRE<br>Symptoms of urinary obstruction<br>max urinary flow rate $\leq 15$ mL/s, voided volume $\geq 150$ ml                                     | Completed trial (12 mth):<br>Fin 1 mg (270)<br>Fin 5 mg (257)<br>Placebo (263)<br>Mean age: 64 years (range 40-83)<br>Mainly Caucasian                                                                                  | Boyersky (modified, 0-36) | Fin 1 mg: 10.6 $\pm$ 5.7<br>Fin 5 mg: 10.2 $\pm$ 5.5<br>Placebo: 9.8 $\pm$ 5.3                        | Fin 1 mg: 10.6 $\pm$ 5.7<br>Fin 5 mg: 10.2 $\pm$ 5.5<br>Placebo: 9.8 $\pm$ 5.3 | Fin 1 mg:<br>Fin 5 mg:<br>Placebo: 5.6 $\pm$ 5.5 | Fin 1 mg: 60.9 $\pm$ 34.3<br>Fin 5 mg: 58.6 $\pm$ 30.5<br>Placebo: 61.0 $\pm$ 36.5 | Fin 1 mg: 76 $\pm$ 94<br>Fin 5 mg: 73 $\pm$ 89<br>Placebo: 73 $\pm$ 91 | Fin 1 mg: 244 $\pm$ 94<br>Fin 5 mg: 258 $\pm$ 112<br>Placebo: 260 $\pm$ 114  | Fin 1 mg: 3.8 $\pm$ 7.2<br>Fin 5 mg: 3.6 $\pm$ 4.2<br>Placebo: 4.1 $\pm$ 4.8 | Fin 1 mg: 3.8 $\pm$ 7.2<br>Fin 5 mg: 3.6 $\pm$ 4.2<br>Placebo: 4.2 $\pm$ 4.8                               |        |                              |  |
| Isotalo et al, 2001           | 5 mg (n=26)                  | Placebo (n=29)                    | 18 mth    | AUR related to BPH. Ability to void after catheterisation and stent implant. Prostate volume measured by TRUS. No further details.                                   | 55 patients enrolled.<br>19 completed the trial.<br>Mean age 71 years (range 52-89)                                                                                                                                     | AUA                       | No significant changes between or within groups. No further details.                                  | Fin: 6.2<br>Placebo: 7.0                                                       |                                                  | Fin: 62<br>Placebo: 70                                                             | Fin: 86<br>Placebo: 81                                                 |                                                                              | Fin: 8.5<br>Placebo: 7.9                                                     |                                                                                                            |        |                              |  |
| Kirby et al, 1992             | 5 mg (n=29)<br>10 mg (n=16)  | Placebo (n=21)                    | 3 mth     | Mean Boyarsky symptom score $\geq 8$ . Confirmed obstruction. Prostate volume by TRUS.                                                                               | Outflow obstruction due to BPH<br>Mean age 64 years (range 48-87)                                                                                                                                                       | Boyersky                  | Fin 5 mg: Baseline 19.3; 3 mth -4.0<br>Fin 10 mg: Baseline 16.9; 3 mth -2.3<br>Placebo: Baseline 18.8 | Fin 5 mg: 7.2<br>Fin 10 mg: 9.3<br>Placebo: 11.1                               |                                                  | Fin 5 mg: 49.7<br>fin 10 mg: 54.3<br>Placebo: 37.7                                 | Fin 5 mg: 104.2<br>Fin 10 mg: 161.2<br>Placebo: 151.9                  | Fin 5 mg: 205.2<br>Fin 10 mg: 234.9<br>Placebo: 217.9                        | Fin 5 mg: 4.1<br>Fin 10 mg: 3.0<br>Placebo: 5.0                              | mmol/L:<br>Fin 5 mg: 1.7<br>Fin 10 mg: 2.7<br>Placebo: 1.8                                                 |        |                              |  |



| Author                    | Finasteride Daily dose (mg)                                                                            | Control                                                 | Duration                                      | Baseline entry criteria                                                                                                                             | Patients                                                                                                          | Score used          | Symptom score                                    | Qmax (mL/s)                                    | Mean flow rate (mL/s)                 | Prostate volume (cm <sup>3</sup> )                                  | Residual urine (ml)             | Total voided volume (ml)    | PSA (ng/ml)                                                                                                            | DHT | Bother                                    | Sexual function score (0-20) |
|---------------------------|--------------------------------------------------------------------------------------------------------|---------------------------------------------------------|-----------------------------------------------|-----------------------------------------------------------------------------------------------------------------------------------------------------|-------------------------------------------------------------------------------------------------------------------|---------------------|--------------------------------------------------|------------------------------------------------|---------------------------------------|---------------------------------------------------------------------|---------------------------------|-----------------------------|------------------------------------------------------------------------------------------------------------------------|-----|-------------------------------------------|------------------------------|
| Nickel et al, 1996        | 5 mg (n=310)                                                                                           | Placebo (n=303)                                         | 24 months                                     | Moderate symptoms . Enlarged prostate by DRE, TRUS PSA <10 ng/ml Max urinary flow rate 5-15 mL/s Total voided volume >150 ml Residual urine ≤150 ml | 613 patients. Mean age: 63 years (range 46-80)                                                                    | Boyersky            | Fin: 15.8 ±7.6<br>Placebo: 16.6 ±7.2             | Fin: 11.1 ±3.7<br>Placebo: 10.9 ±3.5           | Fin: 11.1 ±3.7<br>Placebo: 10.9 ±3.5  | Fin: 44.1 ±23.5<br>Placebo: 45.8 ±22.4                              | Residual urine ≤150 ml          | Total voided volume >150 ml | Baseline not provided. Mean change from baseline at :<br>Fin: 1 yr -50%; 2 yr -50%<br>Placebo: 1 yr +5.5%; 2 yr +13.3% |     |                                           |                              |
| PROSPECT                  |                                                                                                        |                                                         |                                               |                                                                                                                                                     |                                                                                                                   |                     |                                                  |                                                |                                       |                                                                     |                                 |                             |                                                                                                                        |     |                                           |                              |
| Sokeland & Albrecht, 1997 | 1 capsule (n=244)                                                                                      | 2 capsules Pro 120/160 (Sabal + urtica extract) (n=245) | 48 weeks                                      | Qmax >15 mL/s, voided volume ≥150 ml                                                                                                                | Number enrolled: 543                                                                                              | AUA                 | Fin: 11.8 ±6.6<br>Pro 160/120: 11.3 ±6.5         | Fin: 12.7 ±4.5<br>Pro 160/120: 12.7 ±4.4       |                                       |                                                                     |                                 |                             |                                                                                                                        |     |                                           |                              |
| [Stoner et al, 1992 a]    | Study 1 (n=86):<br>Fin 5 mg (n=10)<br>10 mg (n=15)<br>20 mg (n=16)<br>40 mg (n=14)<br>80 mg (n=11)     | Study 1: Placebo (n=14)                                 | Study 1: 12 weeks on & 12 weeks off treatment | Enlarged prostate volume >30 cc by MRI & TRUS (range 28-168 cm <sup>3</sup> )<br>Significant lower urinary tract obstruction                        | Number enrolled: 86<br>Number completed: 78<br>Mean age 65 years (range 40-80)                                    |                     |                                                  |                                                |                                       | Fin 5 mg: 71.6 ±39.2<br>Placebo: 79.7 ±37.0                         |                                 |                             |                                                                                                                        |     |                                           |                              |
| [Stoner et al, 1992 b]    | Study 2 (n=104):<br>Fin 0.2 mg (n=18)<br>0.5 mg (n=15)<br>1.0 mg (n=17)<br>5 mg (n=15)<br>40 mg (n=13) | Study 2: Placebo (n=25)                                 | Study 2: 24 wks                               | Prostate volume >30 cc by MRI (range 26 to 279 cm <sup>3</sup> )<br>Significant lower urinary tract obstruction                                     | Number enrolled: 104<br>Number completed: 93<br>Mean age 64 years (range 40-80)                                   | Boyersky            | Fin 1/5mg: 18.4 (no SD)<br>Placebo: 16.5 (no SD) | Fin 1/5mg: 9.5 (no SD)<br>Placebo: 9.2 (no SD) |                                       | Fin 1 mg: 86.3 ±64.5<br>Fin 5 mg: 66.6 ±40.4<br>Placebo: 63.5 ±30.6 |                                 |                             | Median<br>Fin 1 mg: 4.0<br>Fin 5 mg: 1.5<br>Placebo: 2.4                                                               |     |                                           |                              |
| Tammela & Kontturi, 1993  | 5 mg (n=19)                                                                                            | Placebo (n=17)                                          | 6 months                                      | Moderate / severe BPH with bladder outlet obstruction. Enlarged prostate-volume by TRUS Max urinary flow rate <15 mL/s. Voiding volume ≥150 ml      | Number patients enrolled: 36<br>Number patients completed: 36<br>Mean age 65 years (range 54-80)                  | Boyersky (modified) | Fin: 10.4<br>Placebo: 9.8                        | Fin: 7.7 ±2.3<br>Placebo: 8.8 ±3.3             | Fin: 4.2 ±2.3<br>Placebo: 4.7 ±2.1    |                                                                     | Fin: 117 ±97<br>Placebo: 93 ±67 |                             | Fin: Baseline 5.4 ±6.4; 6 mth 2.9 ±3.0<br>Placebo: Baseline 4.0 ±2.7; 6 mth 4.3 ±3.1                                   |     |                                           |                              |
| Tenover et al, 1997       | 5 mg (n=1589 per protocol)<br>1736 analysed for safety                                                 | Placebo (n=523 per protocol)<br>579 analysed for safety | 12 months                                     | Moderate to severe symptoms of clinically diagnosed BPH. Enlarged prostate on DRE PSA <10 ng/ml                                                     | Number patients AUA (0-35) enrolled: 2808; 2315 randomised<br>Mean age 63 years (range 45-94)<br>Mainly Caucasian |                     | Fin: 19.03<br>Placebo: 18.35                     |                                                |                                       |                                                                     |                                 |                             |                                                                                                                        |     | Bill (0-13)<br>Fin: 4.76<br>Placebo: 4.67 |                              |
| Yu et al, 1995            | 5 mg (n=25)                                                                                            | Placebo (n=25)                                          | 6 months                                      | Bothersome symptoms of BPH. Enlarged prostate on DRE & TRUS                                                                                         | Number patients AUA (0-35) enrolled: 50<br>Number patients completed: 46<br>Mean age: 65 years (range 50-82)      |                     | Fin: 19.45 ±6.63<br>Placebo: 16.68 ±4.06         | Fin: 11.19 ±2.47<br>Placebo: 11.44 ±4.76       | Fin: 5.52 ±2.0<br>Placebo: 5.74 ±2.47 | Fin: 26.70 ±9.26<br>Placebo: 20.12 ±7.85                            |                                 |                             | Fin: 2.76 ±2.05<br>Placebo: 2.95 ±2.59                                                                                 |     |                                           |                              |
